# Supplementary material for: Therapist voices on a youth mental health pilot: Gender, sexual and cultural responsiveness and therapy modality
Source: Research Square preprint supplement (doi:10.21203/rs.3.rs-1544378/v1), 2022-04-20
Supplement: Supplementary file 1 [file 1bfd30fd51af1b1fd6fe028d.docx]

**Appendix Two**

Survey Two distributed by Evaluation Team

| Question | Response Option |
| --- | --- |
| What is your role title in the Piki service | Mental health nurse, counsellor, psychologist, social worker, mental health practitioner |
| Which ethnic group do you belong to | NZ European, Māori, Samoan, Cook Island Maori, Tongan, Niuean, Chinese, Indian, Other |
| Please tell us your gender | Male, female, gender diverse |
| Please tell us which age band you belong to | 20-29, 30-39, 40-49, 50+ |
| Please tell us which organisation you work for | PHO1, PHO2, PHO3, University 1, University 2, Stepped Care provider |
| **CBT Questions** |  |
| What proportion of Piki clients are you using Beckian CBT with | None, some, about half, most, all. |
| With what proportion of Piki clients are you doing in or out of session behavioural experiments to test specific predictions | None, some, about half, most, all. |
| With what proportion of Piki clients are you setting homework or between session tasks | None, some, about half, most, all. |
| With what proportion of Piki clients are you setting a specific agenda for the session | None, 5-25%, 26-50%, 51-75%, 76-100% |
| **About your work for Piki** |  |
| What is your FTE per week on the Piki project | 0-0.2 FTE, 0.2 – 0.4 FTE, 0.4 – 0.6 FTE, 0.6 – 0.8 FTE, 0.8 – 1.0 FTE |
| How many Piki clients do you see a week on average | 1-5, 6-10, 11-15, 16-20, 21-25, 26-30 |
| Do you feel that you are able to see Piki clients for as many sessions as they need | Yes, No – please explain (free text), Not sure |
| Are your Piki clients mostly mild/moderate | Only mild-moderate, mild to moderate with a small number of severe, More numbers of severe than I was expecting, More severe than mild to moderate |
| What are clients saying about other parts of the Piki service:  - Digital app  - Peer Support | very satisfied, somewhat satisfied, neither satisfied or dissatisfied, somewhat dissatisfied, very dissatisfied |
| Do you consider the administration workload required for Piki clients to be manageable | Smiley face slider scale, 5 levels |
| Do you have control of bookings made in your diary? | Never, sometimes, about half the time, most of the time, always |
| To what extent are you able to re-book clients at the frequency you believe they require | Never, sometimes, about half the time, most of the time, always. |
| If you use Kaupapa Maori1 based models with Piki clients, please identify which main frameworks you use | Te Whare Tapa Wha; Te Wheke;  Tikanga; Dynamic of Whanaungatanga;  Poutama Powhiri; Tika, Pono, Aroha;  Kahui Ao; Hua Oranga |
| Are there any changes you would like to make to the Piki service delivery model to make it more effective for clients | Free text |
