# Supplementary material for: Therapist voices on a youth mental health pilot: Gender, sexual and cultural responsiveness and therapy modality
Source: Research Square preprint supplement (doi:10.21203/rs.3.rs-1544378/v1), 2022-04-20
Supplement: Supplementary file 2 [file dc33780befcf16d8ab432849.docx]

**Appendix One**

Survey one distributed by PHO Psychologist

| **Question** | **Response Option** |
| --- | --- |
| Email address | Free text |
| Name | Free text |
| Cultural identity or ethnicity | Free text |
| Gender identity | Free text |
| Job title | Free text |
| Please select your profession | Free text |
| How many years of experience do you have working in mental health or addictions? | Free text |
| Cognitive Behavioural Therapy | Expert/Beginner/Competent/No training |
| Motivational Interviewing | Expert/Beginner/Competent/No training |
| Dialectical Behaviour Therapy | Expert/Beginner/Competent/No training |
| Family therapies (family systems, dynamic family therapy, etc.) | Expert/Beginner/Competent/No training |
| Solution Focused Brief Therapy (SFBT) | Expert/Beginner/Competent/No training |
| Mindfulness based therapies | Expert/Beginner/Competent/No training |
| Brief Psychotherapy | Expert/Beginner/Competent/No training |
| Problem Solving Therapy (PST) | Expert/Beginner/Competent/No training |
| Acceptance and Commitment Therapy (ACT) | Expert/Beginner/Competent/No training |
| Supportive counselling | Expert/Beginner/Competent/No training |
| Brief intervention | Expert/Beginner/Competent/No training |
| Group therapy and skills training | Expert/Beginner/Competent/No training |
| Eye Movement Desensitization and Reprocessing (EMDR) | Expert/Beginner/Competent/No training |
| Cognitive Processing Therapy (CPT) and/or Trauma-Focused CBT (TF-CBT) | Expert/Beginner/Competent/No training |
| Other talk therapies | Expert/Beginner/Competent/No training |
| Mental health assessment (this covers screening for common conditions such as anxiety and depression) | Expert/Beginner/Competent/No training |
| Alcohol and other drugs, gambling, and addictive behaviours | Expert/Beginner/Competent/No training |
| Psychological conditions (this includes the use of formal psychological assessments such as the MMPI-II, PAI, WISC, and WAIS) | Expert/Beginner/Competent/No training |
| Risk assessment | Expert/Beginner/Competent/No training |
| Neuropsychological (this includes use of the RBANS, Stroop, and other neuropsychological assessments) | Expert/Beginner/Competent/No training |
| Other assessments (please elaborate) | Expert/Beginner/Competent/No training |
| Delivering talking therapy | Percentage of time spent on this |
| Writing notes | Percentage of time spent on this |
| Phone calls and text messages to patients | Percentage of time spent on this |
| Phone calls and text messages to people other than patients (GP's, parents, etc.) | Percentage of time spent on this |
| Meetings other than with patients | Percentage of time spent on this |
| What other functions take up your time during the week? | Percentage of time spent on this |
| Inclusion of cultural practices (such as referral to cultural advisors or services, co-working with cultural services, cultural supervision). | Occasionally/Never/Sometimes/Always/Often |
| Inclusion of a person’s preferences (for example, their spiritual values, choice of therapy or therapist). | Occasionally/Never/Sometimes/Always/Often |
| Family or whānau member involvement (either directly in therapy or by consultation). | Occasionally/Never/Sometimes/Always/Often |
| Identifying and addressing co-existing problems (such as addictions, mental health, physical health, long-term physical illness and disability). | Occasionally/Never/Sometimes/Always/Often |
| Type of training required (please include details of actual training courses if relevant) | Free text |
| Are there any talking therapies that you think could be made more available in your service and why? | Free text |
| What type of talking therapy supervision do you receive (e.g. one-to-one or group) and how often do you receive it? | Individual supervision with another supervisor/Individual supervision approximately fortnightly with an Explore supervisor/Free Text |
| What further supervision, if any, do you require? | Free text |
| Do you provide supervision of talking therapies to other practitioners? | Yes/No |
| Do you assess the progress that a person makes in talking therapy? | Yes/No |
| Do you assess the effectiveness of the therapy you deliver? | Yes/No |
| Do you routinely use progress and outcome measures within your talking therapy practice? | Yes/No |
| Do you think current delivery of talking therapies is meeting demand? | Yes/No |
| Please briefly describe reasons for your answer to the previous question. | Free text |
| What do you think are the main strengths of the current delivery of talking therapies? | Free text |
| What do you think are the main areas for development? | Free text |
| What development is required to meet the needs of cultural and ethnic groups? | Free text |
| Do you have any further comments about current delivery of talking therapies within your service or practice? | Free text |
| Approximately how long did it take you to complete this survey? | Less than 15 minutes/15-30 minutes |
| What company or organisation do you work for? | Free text |
